# Supplementary material
Source: PubMed Central journal article supplement (PMC2042203)

a)

### Best Alpha Fits: Train and Test

DARRP32 gene

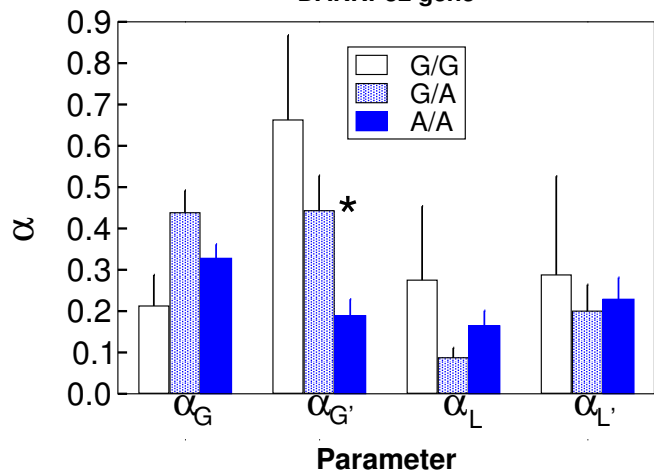

b)

### Best Alpha Fits: Train and Test

DRD2 gene

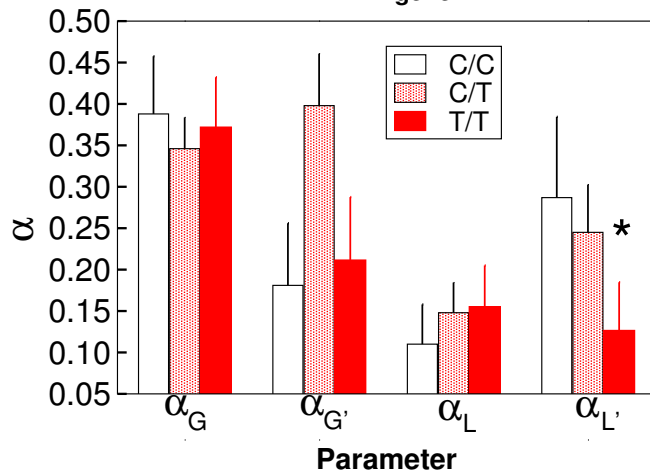

### Best Alpha Fits: Train and Test

COMT gene

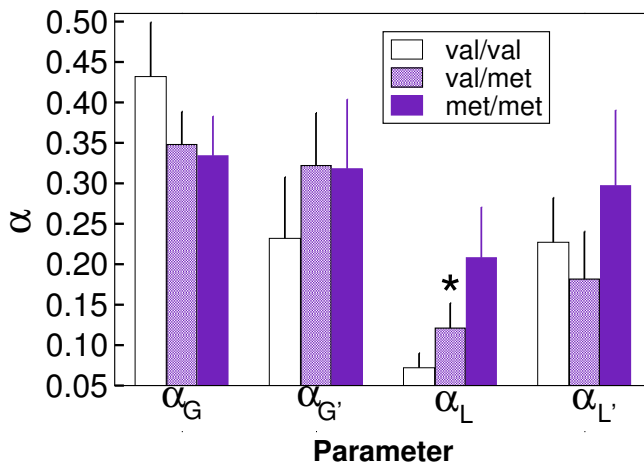

Supplement: pnas_0706111104_2.pdf [file pnas_0706111104_2.pdf]
