# Supplementary material
Source: PubMed Central journal article supplement (PMC2042203)
Supplement: pnas_0706111104_4.pdf [file pnas_0706111104_4.pdf]

**Table 1. Reaction times for *COMT* and *DRD2* genotypes.**

| Genotype           | Choose-A    | Avoid-B     | Post-correct | Post-error  |
|--------------------|-------------|-------------|--------------|-------------|
| <b><i>DRD2</i></b> |             |             |              |             |
| C/C                | 969 (100)   | 1,279 (134) | 801 (45)     | 882 (63)    |
| C/T                | 1,105 (106) | 1,186 (94)  | 1,008 (80)   | 1,168 (103) |
| T/T                | 1,046 (118) | 1,076 (94)  | 1,120 (156)  | 1,211 (185) |
| <b><i>COMT</i></b> |             |             |              |             |
| val/val            | 1,224 (143) | 1,337 (122) | 1,040 (136)  | 1,135 (157) |
| val/met            | 1,042 (107) | 1,084 (84)  | 1,032 (80)   | 1,165 (112) |
| met/met            | 993 (104)   | 1,225 (129) | 945 (127)    | 1,093 (144) |

No significant differences were observed for raw RT's, but only in the relative measures described in the main text (For *DRD2*: Avoid-B compared with Choose-A RTs; and for *COMT*: Post-error compared with post-correct RTs). Values in parentheses reflect standard error.
