# Supplementary material
Source: PubMed Central journal article supplement (PMC2042203)
Supplement: pnas_0706111104_5.pdf [file pnas_0706111104_5.pdf]

**Table 2. Mean best fitting parameter values for Gain-Loss Q model.**

| $\alpha_G$  | $\alpha_L$  | $\beta$     | $\alpha_{G'}$ | $\alpha_{L'}$ | $\beta'$   |
|-------------|-------------|-------------|---------------|---------------|------------|
| 0.36 (0.24) | 0.14 (0.21) | 0.29 (0.18) | 0.31 (0.36)   | 0.22 (0.33)   | 0.2 (0.24) |

Standard deviations are in parentheses.
