# Supplementary material
Source: PubMed Central journal article supplement (PMC2042203)
Supplement: pnas_0706111104_6.pdf [file pnas_0706111104_6.pdf]

**Table 3. Per-subject mean LLE and pseudo- $R^2$  values for model fit to data.**

|                                | Train          | Test          |
|--------------------------------|----------------|---------------|
| <b>LLE</b>                     | -72.75 (63.64) | -33.87 (32.0) |
| <b>pseudo-<math>R^2</math></b> | 0.327 (0.19)   | 0.324 (0.24)  |

Standard deviations are in parentheses. Train: parameters optimized to fit training phase trial-by-trial data as a function of feedback and time. Test: parameters optimized during the learning phase in order to fit subsequent test phase performance.
