# Supplementary material
Source: PubMed Central journal article supplement (PMC2042203)
Supplement: pnas_0706111104_7.pdf [file pnas_0706111104_7.pdf]

**Table 4. Mean best fitting parameter values to BG-OFC Q learning model.**

| $\alpha_{BG}$ | $\alpha_{OFC}$ | $\beta$     |
|---------------|----------------|-------------|
| 0.17 (0.15)   | 0.33 (0.39)    | 0.32 (0.23) |

Standard deviations are in parentheses.
