# Supplementary material
Source: PubMed Central journal article supplement (PMC2042203)
Supplement: pnas_0706111104_8.pdf [file pnas_0706111104_8.pdf]

**Table 5. Per-subject mean LLE and pseudo- $R^2$  values for BG-OFC Q learning model.**

|                                | Train        | Test          |
|--------------------------------|--------------|---------------|
| <b>LLE</b>                     | -74.4 (62.5) | -35.13 (32.2) |
| <b>pseudo-<math>R^2</math></b> | 0.309 (0.18) | 0.29 (0.25)   |

Standard deviations are in parentheses.
