# Supplementary material
Source: PubMed Central journal article supplement (PMC2042203)

# Trial to Trial Adjustments

## COMT effects across training

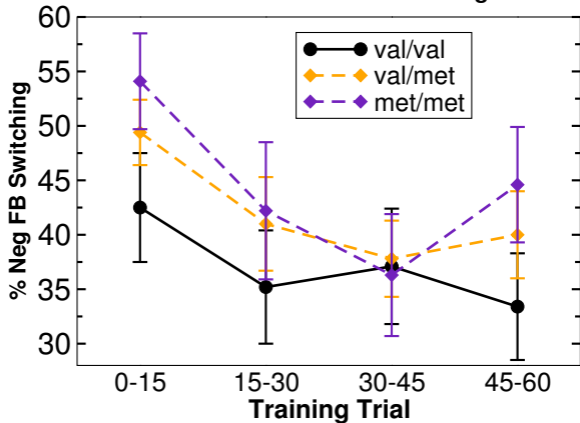

Supplement: pnas_0706111104_1.pdf [file pnas_0706111104_1.pdf]

Q values fit to Test

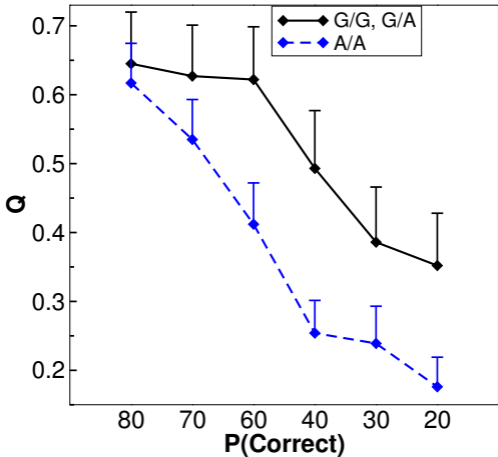

Supplement: pnas_0706111104_3.pdf [file pnas_0706111104_3.pdf]
